# Supplementary material for: Type II restriction endonucleases—a historical perspective and more
Source: PubMed Central journal article supplement (PMC4081073; doi:10.1093/nar/gku447), 2014-06-26
Supplement: supp_gku447_Pingoud_et_al_SUPPLEMENTARY_MATERIAL.pdf [file supp_gku447_Pingoud_et_al_SUPPLEMENTARY_MATERIAL.pdf]

## SUPPLEMENTARY FIGURE & TABLE LEGENDS

**Supplementary Figure S1.** Procedures used for cloning R-M systems. Plasmid libraries are prepared and digested with the restriction enzyme whose gene is sought (middle flow diagram). The digests are used to transform *E.coli*, and survivors are screened individually, or pooled and cycled through a second round of digestion. This 'methylase selection' yields complete R-M systems sometimes, but more often only the M gene. The libraries can be exposed to phage to select for cells that carry the complete R-M system and are able to restrict, but this method is unreliable. When only the M gene is isolated, adjacent fragments can be identified and analyzed and the R gene recovered non-selectively. N-terminal amino acid analysis of the purified REase, and internal tryptic peptide analysis, are helpful in these cases (right flow diagram). Increasingly, R-M systems are now identified by whole-genome sequencing using 454- and PacBio-machines and bioinformatics analysis (left flow diagram). The systems are then retrieved by PCR or gene synthesis. PacBio is particularly useful in this regard because it delivers the gene sequences, and also often the recognition sequence and the position of DNA modification (1). Cloning R-M systems has brought two major benefits: better, cheaper, laboratory reagents for DNA manipulation, and extensive insight into the organizations, evolution and biochemistry of the proteins involved.

**Supplementary Table 1.** R-M systems cloned at New England Biolabs, Inc., 1981-2013. The list is not exhaustive, and Type IV systems are omitted. The table is organized according to the research group responsible for the cloning. Some projects involved more than one group resulting in duplicate table entries. Several entries repeat published work reported by others. Some projects spanned several years; the date generally refers to the cloning of the REase gene. Some dates are estimates. The sequences of most of the systems are available in REBASE and GenBank, although many have not been formally reported in the scientific literature. **Group A:** Geoff Wilson, Donald Nwankwo, Chuck Card, Rebecca Croft, Keith Lunnen, Tineka Jager, Elizabeth Van Cott, Russ Camp, Shu-Zi Chen, Janet Barsomian, Mary Looney, Barton Slatko, Laurie Moran, Bo-Hong Zhang, Marta Meda, Dan Heiter, Jonathan O'Driscoll, Hua Wang. **Group B:** Rich Roberts, Iain Murray, Alexy Fomenkov, Rick Morgan, Brian Anton, Juliane Krebs. **Group C:** Joan Brooks, Kim Howard, Karen Silber, Laura Szynter, Peter Nathan, Brian Anton. **Group D:** Shuang-yong Xu, Jian-Ping Xiao, Jim Samuelson, Alexey Fomenkov, Zhenyu Zhu, Siu-Hong Chan. **Group E:** Rick Morgan, Carol Polisson, Yvette Luyten. **Group F:** Zhenyu Zhu, Shengxi Guan, Aine Quimby, Janine Borgaro. '454' and 'Pac' refer to systems identified by bioinformatics analysis of 454 and Pac Bio genome sequencing projects under the direction of group B. 'CSH' refers to clones isolated or analyzed at Cold Spring Harbor Laboratory (2,3).

**Supplementary Table S2.** Restriction enzyme-DNA co-crystal structures solved by X-ray crystallography. Enzymes crystallized without DNA are omitted. Column 1: year the structure was published. Column 2: name of the enzyme. Column 3: the DNA sequence recognized and the position of cleavage ('|'). PabI (last entry) acts as a sequence-specific DNA-adenine N-glycosylase rather than an endonuclease; catalysis creates apurinic sites that are thought to undergo phosphodiester bond hydrolysis spontaneously (\*). Most recognition sequences are symmetric and cleavage occurs at the same position on the complementary strand. Column 4:

the oligomeric form in which the enzyme cleaves DNA. '1': binds to recognition sequence and cleaves as a monomer; '1-2': binds as monomer but dimerizes transiently to accomplish cleavage; '2': binds and cleaves as a homodimer; '2-4': binds as a homodimer, but cleaves as a dimer of dimers. Column 5: publication reporting the structure.

**Supplementary Table S3.** Approximate numbers of Type II REases in each subtype as described in the text. Adapted from REBASE (May 24, 2014). Subtypes P, A, C, G, S, and M include both characterized enzymes, and putative enzymes identified by bioinformatics analysis of sequenced genomes and meta-genomic samples. Some of the subtype M enzymes included here might better be classified as Type IV REases. Subtypes H, T, B, E, and F include only characterized REases. Among these, subtypes B, E and F are probably far more common than the numbers shown here suggest.

**Supplementary Figure S1.** R-M system cloning workflow

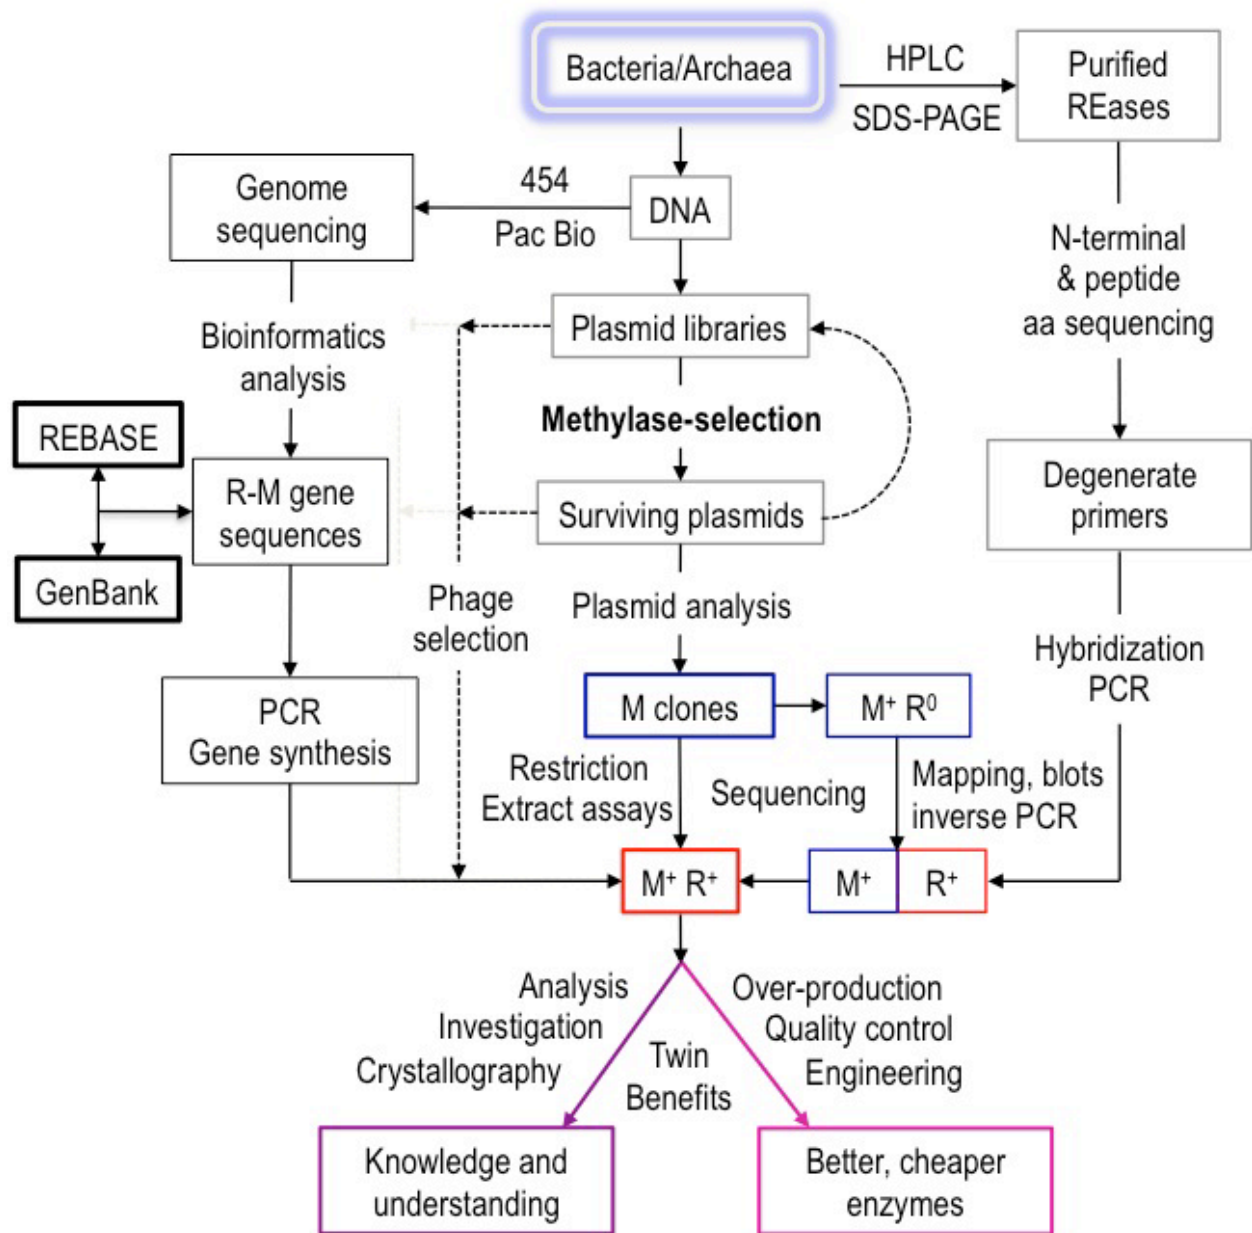

**Supplementary Table S1. R-M systems cloned at New England Biolabs, Inc.**

**Group A**

| Enzyme  | Recognition Sequence | Year |
|---------|----------------------|------|
| PstI    | CTGCAG               | 1981 |
| PstII   | CATCAG 25/27         | 1981 |
| EcoRI   | GAATTC               | 1982 |
| FokI    | GGATG 9/13           | 1983 |
| HaeII   | RGCGCY               | 1983 |
| HaeIII  | GGCC                 | 1983 |
| HhaI    | GCGC                 | 1983 |
| HhaII   | GANTC                | 1983 |
| Hinfl   | GANTC                | 1983 |
| MspI    | CCGG                 | 1983 |
| BamHI   | GGATCC               | 1984 |
| BanI    | GGYRCC               | 1984 |
| DdeI    | CTNAG                | 1984 |
| HgaI    | GACGC                | 1984 |
| HgiAI   | GWGCWC               | 1984 |
| HindII  | GTYRAC               | 1984 |
| HindIII | AAGCTT               | 1984 |
| TaqI    | TCGA                 | 1984 |
| AluI    | AGCT                 | 1985 |
| BanII   | GRGCYC               | 1985 |
| BglI    | GCC N5 GGC           | 1985 |
| FnuDII  | CGCG                 | 1985 |
| FnuDIII | GCGC                 | 1985 |
| HpaII   | CCGG                 | 1985 |
| NlaIII  | CATG                 | 1985 |
| NlaIV   | GGNNCC               | 1985 |
| SalI    | GTCGAC               | 1985 |
| AvaI    | CYCGRG               | 1986 |
| AvaII   | GGWCC                | 1986 |
| FnuDI   | GGCC                 | 1986 |
| AatII   | GACGTC               | 1987 |
| AccI    | GTMKAC               | 1987 |
| AflII   | CTTAAG               | 1987 |
| HinP1I  | GCGC                 | 1987 |
| NaeI    | GCCGGC               | 1987 |
| NcoI    | CCATGG               | 1987 |
| XbaI    | TCTAGA               | 1987 |
| AvrI    | CYCGRG               | 1988 |
| AvrII   | CCTAGG               | 1988 |
| BalI    | TGGCCA               | 1988 |
| BstYI   | RGATCY               | 1988 |
| MwoI    | GC N7 GC             | 1988 |
| SacII   | CCGCGG               | 1988 |
| Sau96I  | GGNCC                | 1988 |
| SmaI    | CCCGGG               | 1988 |
| SphI    | GCATGC               | 1988 |
| XmaI    | CCCGGG               | 1988 |
| XmaIII  | CGGCCG               | 1988 |

| Enzyme   | Recognition Sequence    | Year | Note |
|----------|-------------------------|------|------|
| AflIII   | ACRYGT                  | 1989 |      |
| BbvI     | GCAGC 8/12              | 1989 |      |
| NciI     | CCSGG                   | 1989 |      |
| SfiI     | GGCC N5 GGCC            | 1989 |      |
| AmelI    | GTGCAC                  | 1990 |      |
| AmelII   | GCCGGC                  | 1990 |      |
| Bfal     | CTAG                    | 1990 |      |
| EarI     | CTCTTC 1/4              | 1990 |      |
| AcI      | CCGC                    | 1991 |      |
| ApoI     | RAATTY                  | 1991 |      |
| AscI     | GGCGCGCC                | 1991 |      |
| SfaNI    | GCATC 5/9               | 1992 |      |
| Tsp509I  | AATT                    | 1992 |      |
| KasI     | GGCGCC                  | 1992 |      |
| MscI     | TGGCCA                  | 1993 |      |
| AgeI     | ACCGGT                  | 1994 |      |
| AhdI     | GAC N5 GTC              | 1994 |      |
| BsrI     | ACTGG 1/-1              | 1994 |      |
| RsaI     | GTAC                    | 1994 |      |
| SnaBI    | TACGTA                  | 1994 |      |
| BlpI     | GCTNAGC                 | 1995 |      |
| BsrBI    | CCGCTC                  | 1997 |      |
| EaeI     | YGGCCR                  | 1997 |      |
| AccI     | AACGTT                  | 1998 |      |
| Bsu36I   | CCTNAGG                 | 1999 |      |
| AlwI     | GGATC 4/5               | 1999 |      |
| BbvCI    | CCTCAGC                 | 2000 |      |
| BssSI    | CACGAG                  | 2000 |      |
| Cac8I    | GCNNGC                  | 2000 |      |
| SfoI     | GGCGCC                  | 2000 |      |
| DrdI     | GAC N6 GTC              | 2001 |      |
| MluCI    | AATT                    | 2001 |      |
| SbfI     | CCTGCAGG                | 2002 |      |
| BmrI     | ACTGGG 5/4              | 2002 |      |
| CspCI    | 10/12 CCAC N5 TTG 12/10 | 2003 |      |
| Acc65I   | GGTACC                  | 2004 |      |
| BssIMI   | GGGTC -3/0              | 2004 |      |
| AleI     | CAC N4 GTG              | 2005 |      |
| AfeI     | AGCGCT                  | 2006 | 454  |
| BstNBI   | GAGTC 4/4               | 2006 |      |
| BspDI    | ATCGAT                  | 2007 | 454  |
| BssKI    | CCNGG                   | 2007 | 454  |
| BstXI    | CCA N6 TGG              | 2007 |      |
| NcuI     | GAAGA 8/7               | 2007 | 454  |
| NgoAVIII | 10/12 TCA N5 GTC 13/11  | 2007 |      |
| SdeOSI   | 10/12 TCAY N4 GTC 13/11 | 2007 |      |
| BtgZI    | GCGATG 10/14            | 2008 | 454  |
| PvuI     | CGATCG                  | 2008 |      |

### Group B

| Enzyme     | Recognition Sequence | Year | Note |
|------------|----------------------|------|------|
| BsuRI      | GGCC                 | 1985 | CSH  |
| MspI       | CCGG                 | 1989 | CSH  |
| TspMI      | CCC GGG              | 2007 |      |
| BsaHI      | GRCGYC               | 2008 |      |
| Hpy188I    | TCNGA                | 2000 |      |
| AbaCI      | CTATCAV              | 2010 |      |
| DrdVI      | GCAGCC               | 2011 |      |
| CjeFIII    | GCAAGG               | 2012 | Pac  |
| CjeFV      | GGRCA                | 2012 | Pac  |
| CjeNIII    | GKAAYG 19/17         | 2012 | Pac  |
| Hpy99XIII  | GCCTA                | 2013 | Pac  |
| Hpy99XIV   | GGWTAA               | 2013 | Pac  |
| HpyAXIV    | GCGTA                | 2013 | Pac  |
| HpyAXVIII  | ACA N8 TAG           | 2013 | Pac  |
| Mba11I     | AGGCGA               | 2013 | Pac  |
| Nal45188II | ACCAGC               | 2013 | Pac  |
| Plu4II     | CGTARC               | 2013 | Pac  |
| SstE37I    | CGAAGAC 20/18        | 2013 | Pac  |
| Cal14237I  | GGTTAG               | 2014 | Pac  |
| DvuIII     | CACNCAC              | 2014 | Pac  |
| Hpy99XIII  | GCCTA                | 2014 | Pac  |
| PaePA71    | GAGGAC               | 2014 | Pac  |

### Group C

| Enzyme | Recognition Sequence | Year |  |
|--------|----------------------|------|--|
| DdeI   | CTNAG                | 1985 |  |
| BamHI  | GGATCC               | 1986 |  |
| BglII  | AGATCT               |      |  |
| SphI   | GCATGC               |      |  |
| EagI   | CGGCCG               |      |  |
| SacII  | CCGCGG               |      |  |
| XhoI   | CTCGAG               |      |  |
| XhoII  | RGATCY               |      |  |

## Group D

| Enzyme   | Recognition Sequence | Year |  |
|----------|----------------------|------|--|
| AatII    | GACGTC               | 1992 |  |
| EcoO109I | RGGNCCY              | 1992 |  |
| BsoBI    | CYCGRG               | 1993 |  |
| TfiI     | GAWTC                | 1993 |  |
| Tth111I  | GAC N3 GTC           | 1993 |  |
| ApaLI    | GTGCAC               | 1994 |  |
| MfeI     | CAATTG               | 1994 |  |
| SacI     | GAGCTC               | 1994 |  |
| Scal     | AGTACT               | 1994 |  |
| SapI     | GCTCTTC 1/4          | 1995 |  |
| BssHII   | GCGCGC               | 1996 |  |
| BslI     | CC N7 GG             | 1996 |  |
| BspHI    | TCATGA               | 1996 |  |
| TseI     | GCWGC                | 1996 |  |
| Tsp45I   | GTSAC                | 1996 |  |
| AgeI     | ACCGGT               | 1997 |  |
| NspI     | RCATGY               | 1997 |  |
| BsrFI    | RCCGGY               | 1998 |  |
| NheI     | GCTAGC               | 1998 |  |
| NspHI    | RCATGY               | 1998 |  |
| OkrAI    | GGATCC               | 1998 |  |
| BpmI     | CTGGAG 16/14         | 1999 |  |
| BsaJI    | CCNNGG               | 2000 |  |
| BsmI     | GAATGC 1/-2          | 2000 |  |
| BstYI    | RGATCY               | 2000 |  |
| TspRI    | CASTG                | 2000 |  |
| BsmBI    | CGTCTC 1/5           | 2000 |  |
| BseRI    | GAGGAG 10/8          | 2000 |  |
| BsaI     | GGTCTC 1/5           | 2001 |  |
| PpuMI    | RGWCCY               | 2001 |  |
| BsaWI    | WCCGGW               | 2001 |  |
| BsmAI    | GTCTC 1/5            | 2001 |  |
| MspAI1   | CMGCKG               | 2001 |  |
| AccI     | CTGAAG 16/14         | 2002 |  |

| Enzyme     | Recognition Sequence | Year | Note |
|------------|----------------------|------|------|
| BsrGI      | TGTACA               | 2002 |      |
| BtsI       | GCAGTG 2/0           | 2003 |      |
| BtsCI      | GGATG 2/0            | 2003 |      |
| N.CviPII   | CCD                  | 2003 |      |
| PhoI       | GGCC                 | 2003 |      |
| TmaI       | CGCG                 | 2003 |      |
| ApeKI      | GCWGC                | 2004 |      |
| BpuSI      | GGGAC 10/14          | 2004 |      |
| BsmFI      | GGGAC 10/14          | 2004 |      |
| CviAII     | CATG                 | 2004 |      |
| CviKI-1    | RGCY                 | 2004 |      |
| CviQI      | GTAC                 | 2004 |      |
| Eco53KI    | GAGCTC               | 2004 |      |
| AsiSI      | GCGATCGC             | 2005 |      |
| BsrDI      | GCAATG 2/0           | 2005 |      |
| EcoNI      | CCT N5 AGG           | 2005 |      |
| N.CviQII   | RAG                  | 2005 |      |
| NarI       | GGCGCC               | 2005 |      |
| NruI       | TCGCGA               | 2005 |      |
| StuI       | AGGCCT               | 2005 |      |
| Tth111II   | CAARCA 11/9          | 2005 |      |
| Bmri       | ACTGGG               | 2006 |      |
| BspQI      | GCTCTTC 1/4          | 2006 | 454  |
| BceSI      | CGAAG 25/27          | 2008 |      |
| BceSIII    | ACGGC 12/14          | 2008 |      |
| BcoDI      | GTCTC                | 2008 |      |
| CatHI      | CTCTTC 1/4           | 2009 |      |
| HpyAV      | CCTTC 6/5            | 2009 |      |
| SauUSI     | SCNGS                | 2009 |      |
| N.φGamma   | ACCGR                | 2011 |      |
| N.BceSVIII | AYSS                 | 2011 |      |
| BsaXI      | 9/12 AC N5 CTCC 10/7 | 2012 |      |
| BisI       | Gm5CNCGC             | 2012 |      |
| FspCI      | ACCTGC 4/8           | 2013 |      |

**Group E**

| Enzyme    | Recognition Sequence | Year |
|-----------|----------------------|------|
|           |                      |      |
| NlaI      | GGCC                 | 1989 |
| NlaIII    | CATG                 | 1989 |
| NlaIV     | GGNNCC               | 1989 |
| NotI      | GCGGCCGC             | 1992 |
| BspMI     | ACCTGC 4/8           | 1993 |
| FseI      | GGCCGGCC             | 1994 |
| RsrII     | CGGWCCG              | 1994 |
| MseI      | TTAA                 | 1996 |
| BccI      | CCATC 4/5            | 1995 |
| Fnu4HI    | GCNGC                | 1995 |
| MboI      | GATC                 | 1995 |
| MbolI     | GAAGA 8/7            | 1995 |
| PshAI     | GAC N4 GTC           | 1995 |
| Pacl      | TTAATTA              | 1996 |
| PmeI      | GTTTAAAC             | 1996 |
| SpeI      | ACTAGT               | 1996 |
| PspGI     | CCWGG                | 1997 |
| AseI      | ATTAAT               | 1998 |
| AseII     | CCSGG                | 1998 |
| Hpy99I    | CGWCG                | 1999 |
| Hpy188I   | TCNGA                | 1999 |
| Hpy188III | TCNNGA               | 1999 |
| HpyCH4III | ACNGT                | 1999 |
| HpyCH4IV  | ACGT                 | 1999 |
| HpyCH4V   | TGCA                 | 1999 |
| MjaI      | CTAG                 | 1999 |
| MjaIII    | GATC                 | 1999 |
| MjaIV     | GTNNAC               | 1999 |
| MjaV      | GTAC                 | 1999 |
| EsaBC3I   | TCGA                 | 2000 |
| AspCNI    | GCSGC                | 2001 |
| BspCNI    | CTCAG 9/7            | 2001 |
| BstEII    | GGTNACC              | 2002 |
| BseYI     | CCAGC                | 2005 |
| FatI      | CATG                 | 2006 |
|           |                      |      |

| Enzyme                     | Recognition Sequence | Year | Note |
|----------------------------|----------------------|------|------|
| <b>Type IIG RM Enzymes</b> |                      |      |      |
| MmeI                       | TCCRAC 20/18         | 2001 |      |
| CstMI                      | AAGGAG 20/18         | 2003 |      |
| DraRI                      | CAAGNAC 20/18        | 2006 |      |
| EsaSSI                     | GACCAC 20/18         | 2006 |      |
| NlaCI                      | CATCAC 19/17         | 2006 |      |
| NmeAIII                    | GCCGAG 21/19         | 2006 |      |
| PspOMII                    | CGCCCAR 20/18        | 2006 |      |
| SdeAI                      | CAGRAG 21/19         | 2006 |      |
| SpoDI                      | GCGGRAG 20/18        | 2006 |      |
| ApyPI                      | ATCGAC 20/18         | 2007 |      |
| Cdpl                       | GCGGAG 20/18         | 2007 |      |
| DrdIV                      | TACGAC 20/18         | 2007 |      |
| PspPRI                     | CCYCAC 21/19         | 2007 |      |
| MaqI                       | CRTTGAC 20/18        | 2008 |      |
| NhaXI                      | CAAGRAG 20/18        | 2008 |      |
| PlaDI                      | CATCAG 21/19         | 2008 |      |
| RpaB5I                     | CGRGAC 20/18         | 2008 |      |
| AquII                      | GCCGNAC 20/18        | 2009 |      |
| AquIII                     | GAGGAG 20/18         | 2009 |      |
| AquIV                      | GRGGAAG 20/18        | 2009 |      |
| AteTI                      | GGGRAG               | 2009 |      |
| CcoMI                      | CAGCAG               | 2009 |      |
| GauT27I                    | CGCGCAGG             | 2009 |      |
| HauII                      | TGGCCA 11/9          | 2009 |      |
| Mae7806I                   | AAGGAG               | 2009 |      |
| MchCM4I                    | GAGGAG 20/18         | 2009 |      |
| PliMI                      | CGCCGAC              | 2009 |      |
| RceI                       | CATCGAC 20/18        | 2009 |      |
| CchII 2010                 | GGARGA 11/9          | 2010 |      |
| CchIII                     | CCCAAG 20/18         | 2010 |      |
| RdeGBI                     | CCGCAG               | 2010 |      |
| RdeGBII                    | ACCCAG 20/18         | 2010 |      |
| Rlall                      | ACACAG               | 2010 |      |
| Rpal                       | GTGGAG 11/9          | 2010 |      |
| RpaBI                      | CCCGCAG 20/18        | 2010 |      |
| RpaTI                      | GRTGGAG 20/18        | 2010 |      |
| Sno506I                    | GCCGAG               | 2010 |      |
| DprMRI                     | GCCCCAG              | 2011 |      |
| NflHI                      | GCGGAG               | 2011 |      |
| RflFIII                    | CGCCAG               | 2011 |      |
| RmuAI                      | CCCGAC               | 2011 |      |
| Wvil                       | CACRAG               | 2011 |      |
| Cgl13032I                  | GGCGCA               | 2012 |      |
|                            |                      |      |      |

## Group F

| Enzyme   | Recognition Sequence   | Year | Note |
|----------|------------------------|------|------|
| AlwNI    | CAG N3 CTG             | 2006 | 454  |
| BmtI     | GCTAGC                 | 2006 | 454  |
| Bpu10I   | CCTNAGC                | 2006 |      |
| BsaHI    | GRCGYC                 | 2006 |      |
| Hpy166II | GTNNAC                 | 2006 |      |
| MslI     | CAY N4 RTG             | 2006 | 454  |
| PciI     | ACATGT                 | 2006 | 454  |
| PspXI    | VCTCGAGB               | 2006 | 454  |
| ZraI     | GACGTC                 | 2006 | 454  |
| Bme1580I | GKGCMC                 | 2007 |      |
| BciVI    | GGATAC 6/5             | 2007 |      |
| BspKT6I  | GATC                   | 2007 |      |
| BstBI    | TTCGAA                 | 2007 |      |
| BstZ17I  | GTATAC                 | 2007 |      |
| FauI     | CCCGC 4/6              | 2007 |      |
| NarI     | GGCGCC                 | 2007 | 454  |
| PspOMI   | GGGCC                  | 2007 | 454  |
| PsiI     | TTATAA                 | 2007 |      |
| SmlI     | CTYRAG                 | 2007 | 454  |
| BscAI    | GCATC 4/6              | 2008 |      |
| BsiHKAI  | GWGCWC                 | 2008 |      |
| BsrBI    | CCGCTC                 | 2008 |      |
| BmgBI    | CACGTC                 | 2009 | 454  |
| Bsp1286I | GDGCHC                 | 2009 |      |
| BspUI    | GCSGC                  | 2009 | 454  |
| BstAPI   | GCA N5 TGC             | 2009 | 454  |
| BstNI    | CCWGG                  | 2009 | 454  |
| PfiFI    | GAC N3 GTC             | 2009 | 454  |
| TseI     | GCWGC                  | 2009 |      |
| BaeI     | 10/15 AC N4 GTAYC 12/7 | 2011 | 454  |
| BaeGI    | GKGCMC                 | 2011 |      |
| BbsI     | GAAGAC 2/6             | 2011 | 454  |
| BsaBI    | GAT N4 ATC             | 2011 | 454  |
| BsiEI    | CGRYCG                 | 2011 |      |
| Ecil     | GGCGGA 11/9            | 2011 | 454  |
| BsgI     | GTGCAG 16/14           | 2012 |      |
| Cac8I    | GCNNGC                 | 2012 |      |
| DrdI     | GAC N6 GTC             | 2013 | 454  |



**Supplementary Table S2.** Restriction Enzyme-DNA Co-Crystal Structures

| Year       | Enzyme   | Recognition sequence | Active form | Reference |
|------------|----------|----------------------|-------------|-----------|
| 1986; 1990 | EcoRI    | G AATTC              | 2           | (4),(5)   |
| 1993       | EcoRV    | GAT ATC              | 2           | (6)       |
| 1994       | PvuII    | CAG CTG              | 2           | (7)       |
| 1995       | BamHI    | G GATCC              | 2           | (8)       |
| 1997       | FokI     | GGATG 9/13           | 1-2         | (9)       |
| 1998       | BglI     | GCCNNNN NGGC         | 2           | (10)      |
| 1999       | MunI     | C AATTG              | 2           | (11)      |
| 2000       | BglII    | A GATCT              | 2           | (12)      |
| 2000       | NaeI     | GCC GGC              | 2           | (13)      |
| 2000       | NgoMIV   | G CCGGC              | 2-4         | (14)      |
| 2001       | BsoBI    | C YCGRG              | 2           | (15)      |
| 2004       | HincII   | GTY RAC              | 2           | (16)      |
| 2004       | BstYI    | R GATCY              | 2           | (17)      |
| 2005       | EcoO109I | RG GNCCY             | 2           | (18)      |
| 2005       | HinP1I   | G CGC                | 1           | (19)      |
| 2005       | MspI     | C CGG                | 1           | (20)      |
| 2005       | SfiI     | GGCCNNNN NGGCC       | 2-4         | (21)      |
| 2006       | Ecl18kI  | CCNGG                | 2-4         | (22)      |
| 2007       | BcnI     | CC SGG               | 1           | (23)      |
| 2007       | MvaI     | CC WGG               | 1           | (24)      |
| 2008       | BpuJI    | CCCGT                | 1-2         | (25)      |
| 2008       | NotI     | GC GGCCGC            | 2           | (26)      |
| 2008       | PspGI    | CCWGG                | 2           | (27)      |
| 2008       | SgrAI    | CR CCGGYG            | 2-4+        | (28)      |
| 2009       | EcoRII   | CCWGG                | 2           | (29)      |
| 2009       | HindIII  | A AGCTT              | 2           | (30)      |
| 2009       | Hpy99I   | CGWCG                | 2           | (31)      |
| 2010       | Eco29KI  | CCGC GG              | 2           | (32)      |
| 2010       | PacI     | TTAAT TAA            | 2           | (33)      |
| 2011       | Hpy188I  | TCN GA               | 2           | (34)      |
| 2011       | OkraI    | G GATCC              | 2           | (35)      |
| 2011       | ThaI     | CG CG                | 2           | (36)      |
| 2012       | Bse634I  | R CCGGY              | 2- 4        | (37)      |
| 2012       | DpnI     | Gm6A TC              | 1           | (38)      |
| 2014       | BfiI     | ACTGGG 5/4           | 2           | (39)      |
| 2014       | PabI     | GTA*C                | 2           | (40)      |

**Supplementary Table S3.** Occurrences of Type II subtypes

| Type II Subtype | Definition from Roberts et al. 2003 [37]<br>Not all subtypes are mutually exclusive | No. of enzymes listed in REBASE |
|-----------------|-------------------------------------------------------------------------------------|---------------------------------|
| <b>P</b>        | Symmetric target and cleavage sites                                                 | 8697                            |
| <b>A</b>        | Asymmetric recognition sequence                                                     | 6230                            |
| <b>C</b>        | Symmetric or asymmetric target. R and M functions in one polypeptide                | 4960                            |
| <b>G</b>        | Symmetric or asymmetric target. Affected by AdoMet                                  | 4954                            |
| <b>S</b>        | Asymmetric target and cleavage sites                                                | 1221                            |
| <b>M</b>        | Subtype IIP or IIA. Require methylated target                                       | 257                             |
| <b>H</b>        | Symmetric or asymmetric target. Similar to Type I gene structure                    | ~ 50                            |
| <b>T</b>        | Symmetric or asymmetric target. R genes are heterodimers                            | 25                              |
| <b>B</b>        | Cleaves both sides of target on both strands                                        | 16                              |
| <b>E</b>        | Two targets; one cleaved, one an effector                                           | 12                              |
| <b>F</b>        | Two targets, both cleaved coordinately                                              | 8                               |

## REFERENCES

1. Murray, I.A., Clark, T.A., Morgan, R.D., Boitano, M., Anton, B.P., Luong, K., Fomenkov, A., Turner, S.W., Korlach, J. and Roberts, R.J. (2012) The methylomes of six bacteria. *Nucleic Acids Res.*, **40**, 11450-11462.
2. Kiss, A., Posfai, G., Keller, C.C., Venetianer, P. and Roberts, R.J. (1985) Nucleotide sequence of the BsuRI restriction-modification system. *Nucleic Acids Res.*, **13**, 6403-6420.
3. Lin, P.M., Lee, C.H. and Roberts, R.J. (1989) Cloning and characterization of the genes encoding the MspI restriction modification system. *Nucleic Acids Res.*, **17**, 3001-3011.
4. McClarin, J.A., Frederick, C.A., Wang, B.C., Greene, P., Boyer, H.W., Grable, J. and Rosenberg, J.M. (1986) Structure of the DNA-EcoRI endonuclease recognition complex at 3 angstrom resolution. *Science*, **234**, 1526-1541.
5. Kim, Y., Grable, J.C., Love, R., Greene, P.J. and Rosenberg, J.M. (1990) Refinement of EcoRI endonuclease crystal structure: A revised protein chain tracing *Science*, **249**, 1307-1309.
6. Winkler, F.K., Banner, D.W., Oefner, C., Tsernoglou, D., Brown, R.S., Heathman, S.P., Bryan, R.K., Martin, P.D., Petratos, K. and Wilson, K.S. (1993) The crystal structure of EcoRV endonuclease and of its complexes with cognate and non-cognate DNA fragments. *EMBO J.*, **12**, 1781-17945.
7. Cheng, X., Balendiran, K., Schildkraut, I. and Anderson, J.E. (1994) Structure of PvuII endonuclease with cognate DNA. *EMBO J.*, **13**, 3927-3935.
8. Newman, M., Strzelecka, T., Dorner, L.F., Schildkraut, I. and Aggarwal, A.K. (1995) Structure of BamHI endonuclease bound to DNA: partial folding and unfolding on DNA binding. *Science*, **269**, 656-663.
9. Wah, D.A., Hirsch, J.A., Dorner, L.F., Schildkraut, I. and Aggarwal, A.K. (1997) Structure of the multimodular endonuclease FokI bound to DNA. *Nature*, **388**, 97-100.
10. Newman, M., Lunnen, K., Wilson, G., Greci, J., Schildkraut, I. and Phillips, S.E.V. (1998) Crystal structure of restriction endonuclease BglI bound to its interrupted DNA recognition sequence. *EMBO J.*, **17**, 5466-5476.
11. Deibert, M., Grazulis, S., Janulaitis, A., Siksnys, V. and Huber, R. (1999) Crystal structure of MunI restriction endonuclease in complex with cognate DNA at 1.7 Å resolution. *EMBO J.*, **18**, 5805-5816.
12. Lukacs, C.M., Kucera, R., Schildkraut, I. and Aggarwal, A.K. (2000) Understanding the immutability of restriction enzymes: crystal structure of BglIII and its DNA substrate at 1.5Å resolution. *Nat. Struct. Biol.*, **7**, 134-140.
13. Huai, Q., Colandene, J.D., Chen, Y., Luo, F., Zhao, Y., Topal, M.D. and Ke, H. (2000) Crystal structure of NaeI - an evolutionary bridge between DNA endonuclease and topoisomerase. *EMBO J.*, **19**, 3110-3118.
14. Deibert, M., Grazulis, S., Sasnauskas, G., Siksnys, V. and Huber, R. (2000) Structure of the tetrameric restriction endonuclease NgoMIV in complex with cleaved DNA. *Nat. Struct. Biol.*, **7**, 792-799.
15. van der Woerd, M.J., Pelletier, J.J., Xu, S. and Friedman, A.M. (2001) Restriction enzyme BsoBI-DNA complex: a tunnel for recognition of degenerate DNA sequences and potential histidine catalysis. *Structure*, **9**, 133-144.

16. Etzkorn, C. and Horton, N.C. (2004) Mechanistic insights from the structures of HincII bound to cognate DNA cleaved from addition of Mg<sup>2+</sup> and Mn<sup>2+</sup>. *J. Mol. Biol.*, **343**, 833-849.
17. Townson, S.A., Samuelson, J.C., Vanamee, E.S., Edwards, T.A., Escalante, C.R., Xu, S.-Y. and Aggarwal, A.K. (2004) Crystal structure of BstYI at 1.85 Å resolution: A thermophilic restriction endonuclease with overlapping specificities to BamHI and BglII. *J. Mol. Biol.*, **338**, 725-733.
18. Hashimoto, H., Shimizu, T., Imasaki, T., Kato, M., Shichijo, N., Kita, K. and Sato, M. (2005) Crystal structures of type II restriction endonuclease EcoO109I and its complex with cognate DNA. *J Biol Chem*, **280**, 5605-5610.
19. Yang, Z., Horton, J.R., Manus, R., Wilson, G.G., Roberts, R.J. and Cheng, X. (2005) Structure of HinP1I endonuclease reveals a striking similarity to the monomeric restriction enzyme MspI. *Nucleic Acids Res.*, **33**, 1892-1901.
20. Xu, Q.S., Roberts, R.J. and Guo, H.C. (2005) Two crystal forms of the restriction enzyme MspI-DNA complex show the same novel structure. *Protein Sci.*, **14**, 2590-2600.
21. Vanamee, E.S., Viadiu, H., Kucera, R., Dorner, L., Picone, S., Schildkraut, I. and Aggarwal, A.K. (2005) A view of consecutive binding events from structures of tetrameric endonuclease SfiI bound to DNA. *EMBO J.*, **24**, 4198-4208.
22. Bochtler, M., Szczepanowski, R.H., Tamulaitis, G., Grazulis, S., Czapinska, H., Manakova, E. and Siksnys, V. (2006) Nucleotide flips determine the specificity of the Ecl18kI restriction endonuclease. *EMBO J.*, **25**, 2219-2229.
23. Sokolowska, M., Kaus-Drobek, M., Czapinska, H., Tamulaitis, G., Szczepanowski, R.H., Urbanke, C., Siksnys, V. and Bochtler, M. (2007) Monomeric Restriction Endonuclease BcnI in the Apo Form and in an Asymmetric Complex with Target DNA. *J. Mol. Biol.*, **369**, 722-734.
24. Kaus-Drobek, M., Czapinska, H., Sokolowska, M., Tamulaitis, G., Szczepanowski, R.H., Urbanke, C., Siksnys, V. and Bochtler, M. (2007) Restriction endonuclease MvaI is a monomer that recognizes its target sequence asymmetrically. *Nucleic Acids Res.*, **35**, 2035-2046.
25. Sukackaite, R., Grazulis, S., Bochtler, M. and Siksnys, V. (2008) The recognition domain of the BpuJI restriction endonuclease in complex with cognate DNA at 1.3-Å resolution. *J Mol Biol*, **378**, 1084-1093.
26. Lambert, A.R., Sussman, D., Shen, B., Manus, R., Nix, J., Samuelson, J., Xu, S.Y. and Stoddard, B.L. (2008) Structures of the Rare-Cutting Restriction Endonuclease NotI Reveal a Unique Metal Binding Fold Involved in DNA Binding. *Structure*, **16**, 558-569.
27. Szczepanowski, R.H., Carpenter, M.A., Czapinska, H., Zaremba, M., Tamulaitis, G., Siksnys, V., Bhagwat, A.S. and Bochtler, M. (2008) Central base pair flipping and discrimination by PspGI. *Nucleic Acids Res*, **36**, 6109-6117.
28. Dunten, P.W., Little, E.J., Gregory, M.T., Manohar, V.M., Dalton, M., Hough, D., Bitinaite, J. and Horton, N.C. (2008) The structure of SgrAI bound to DNA; recognition of an 8 base pair target. *Nucleic Acids Res*, **36**, 5405-5416.
29. Golovenko, D., Manakova, E., Tamulaitiene, G., Grazulis, S. and Siksnys, V. (2009) Structural mechanisms for the 5'-CCWGG sequence recognition by the N- and C-terminal domains of EcoRII. *Nucleic Acids Res*, **37**, 6613-6624.
30. Watanabe, N., Takasaki, Y., Sato, C., Ando, S. and Tanaka, I. (2009) Structures of restriction endonuclease HindIII in complex with its cognate DNA and divalent cations. *Acta Crystallogr. D Biol. Crystallogr.*, **65**, 1326-1333.

31. Sokolowska, M., Czapinska, H. and Bochtler, M. (2009) Crystal structure of the beta beta alpha-Me type II restriction endonuclease Hpy99I with target DNA. *Nucleic Acids Res*, **37**, 3799-3810.
32. Mak, A.N., Lambert, A.R. and Stoddard, B.L. (2010) Folding, DNA Recognition, and Function of GIY-YIG Endonucleases: Crystal Structures of R.Eco29kl. *Structure*, **18**, 1321-1331.
33. Shen, B.W., Heiter, D.F., Chan, S.H., Wang, H., Xu, S.Y., Morgan, R.D., Wilson, G.G. and Stoddard, B.L. (2010) Unusual target site disruption by the rare-cutting HNH restriction endonuclease Pacl. *Structure*, **18**, 734-743.
34. Firczuk, M., Wojciechowski, M., Czapinska, H. and Bochtler, M. (2011) DNA intercalation without flipping in the specific Thal-DNA complex. *Nucleic Acids Res*, **39**, 744-754.
35. Manakova, E., Grazulis, S., Zaremba, M., Tamulaitiene, G., Golovenko, D. and Siksny, V. (2012) Structural mechanisms of the degenerate sequence recognition by Bse634I restriction endonuclease. *Nucleic Acids Res*, **40**, 6741-6751.
36. Siwek, W., Czapinska, H., Bochtler, M., Bujnicki, J.M. and Skowronek, K. (2012) Crystal structure and mechanism of action of the N6-methyladenine-dependent type IIM restriction endonuclease R.DpnI. *Nucleic Acids Res*, **40**, 7563-7572.
39. Golovenko, D., Manakova, E., Zakrys, L., Zaremba, M., Sasnauskas, G., Grazulis, S. and Siksny, V. (2014) Structural insight into the specificity of the B3 DNA-binding domains provided by the co-crystal structure of the C-terminal fragment of Bfil restriction enzyme. *Nucleic acids Res.*, **42**, 4113-4122.
40. Miyazono, K., Furuta, Y., Watanabe-Matsui, M., Miyakawa, T., Ito, T., Kobayashi, I. and Tanokura, M. (2014) A sequence-specific DNA glycosylase mediates restriction-modification in *Pyrococcus abyssi*. *Nat. Commun.*, **5**, 3178.
